# Supplementary material for: Vagueness and Ambiguity in Communication of Case Management: A Content Analysis in the Australian National Disability Insurance Scheme
Source: PubMed Central journal article supplement (PMC7977023; doi:10.5334/ijic.5590), 2021-03-19

# Intervention tree (throughputs) of the community-based case management taxonomy

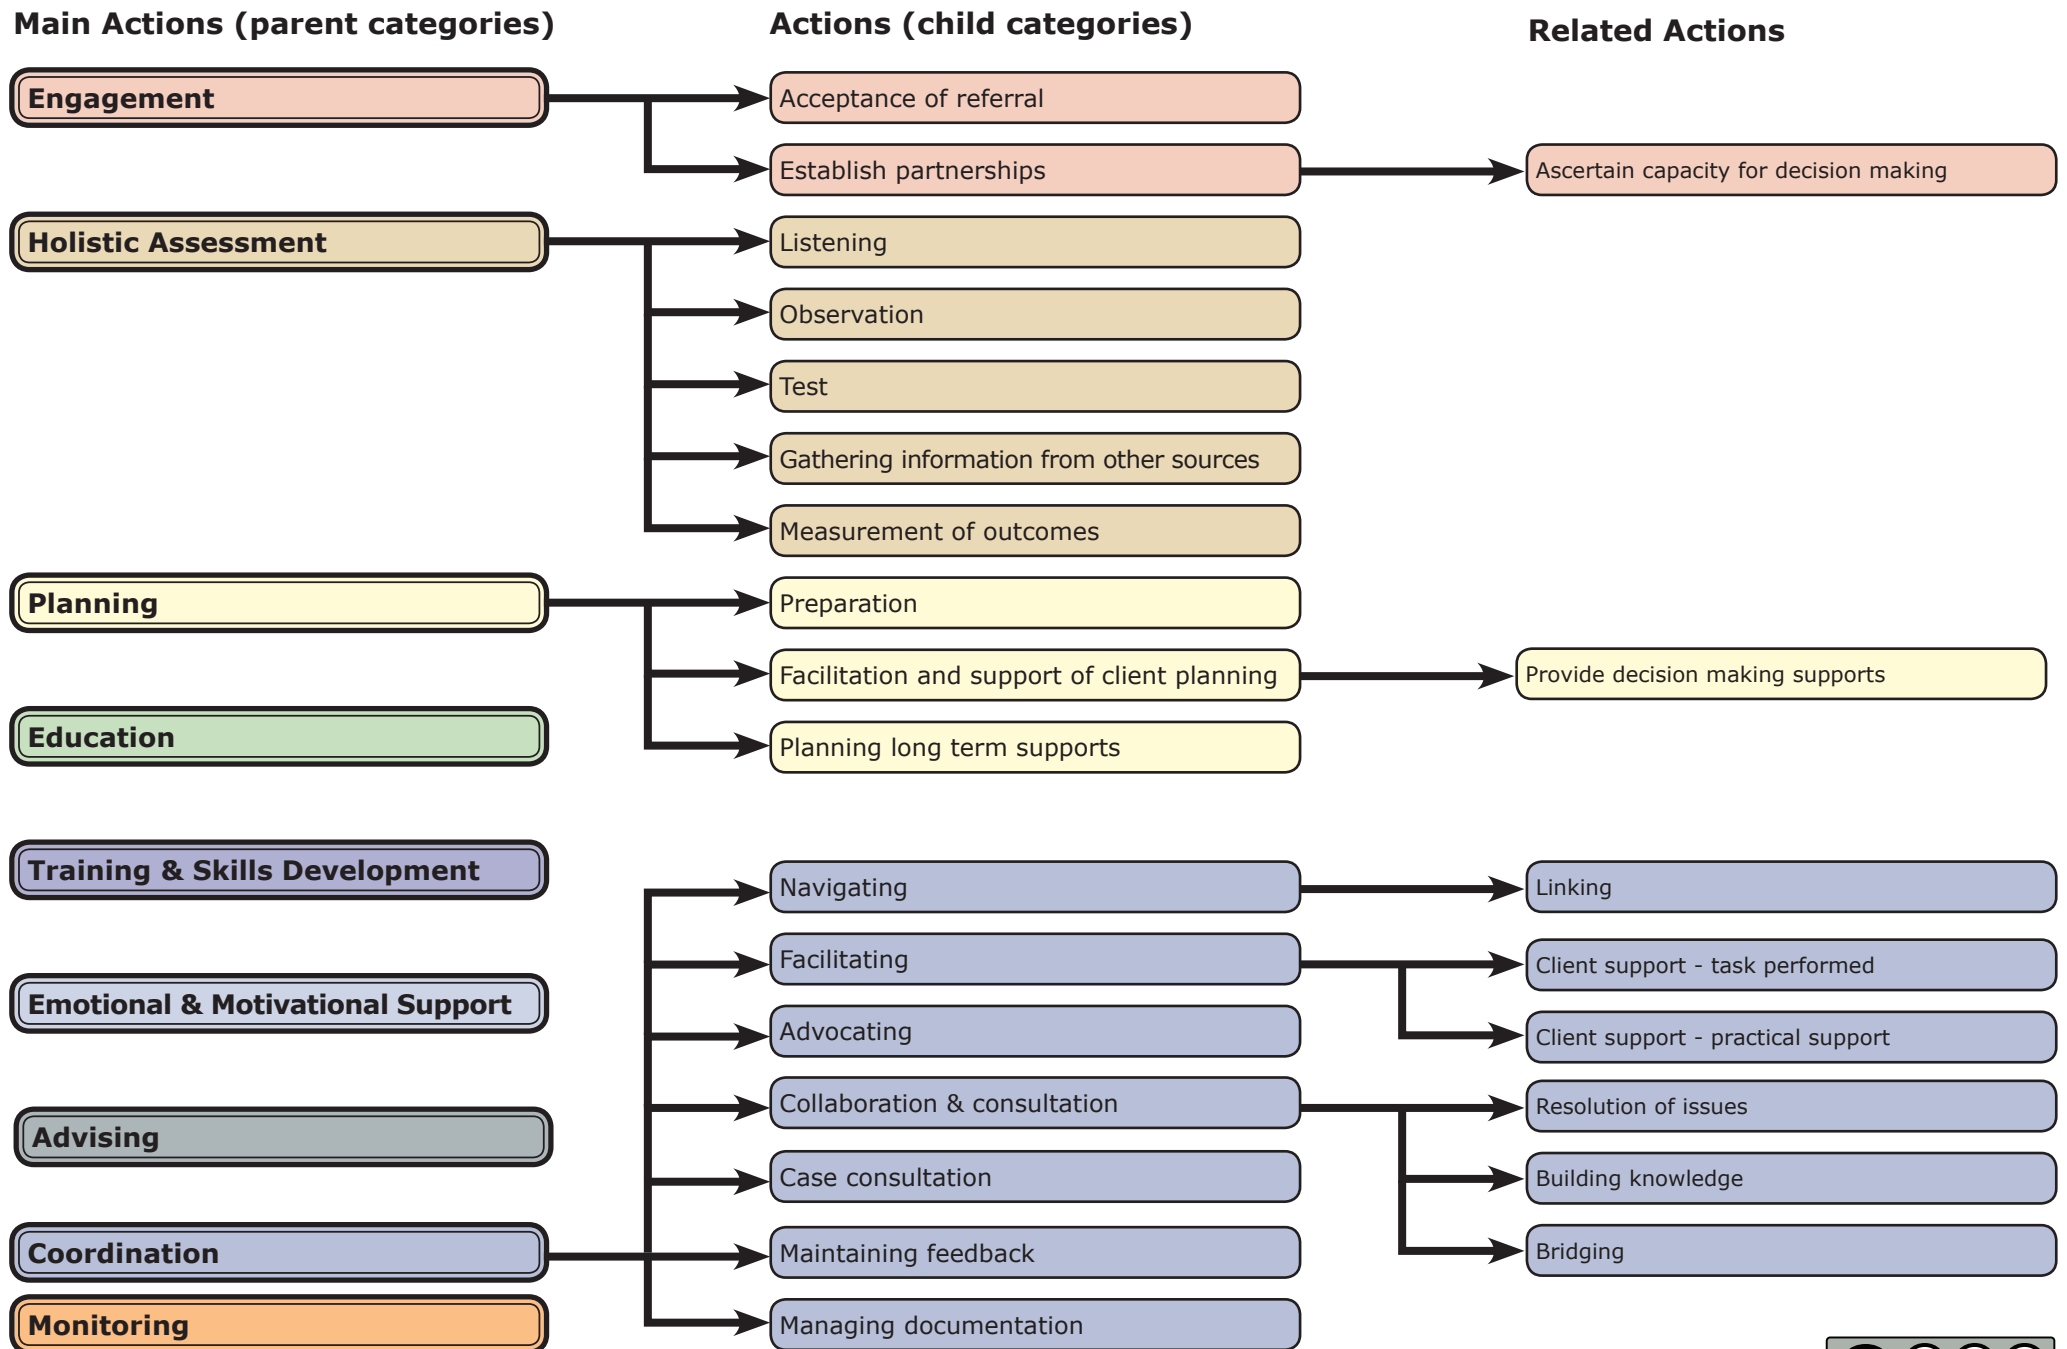

Supplement: ijic-21-1-5590-s1.pdf [file ijic-21-1-5590-s1.pdf]
