# Supplementary material for: Vagueness and Ambiguity in Communication of Case Management: A Content Analysis in the Australian National Disability Insurance Scheme
Source: PubMed Central journal article supplement (PMC7977023; doi:10.5334/ijic.5590), 2021-03-19
Supplement: ijic-21-1-5590-s2.pdf [file ijic-21-1-5590-s2.pdf]

## Appendix 2

### Content analysis documents reference (2017)

1. Bigby, C., & Douglas, J. (2015). Support for decision making - A practice framework. Retrieved from [http://www.adhc.nsw.gov.au/\\_data/assets/file/0006/275685/Guidelines\\_NSW\\_CCSP\\_2015\\_v2.0.pdf](http://www.adhc.nsw.gov.au/_data/assets/file/0006/275685/Guidelines_NSW_CCSP_2015_v2.0.pdf)
2. Gadow, F., & Riches, V. (2014). Practice guide to person centred clinical risk assessment. New South Wales Government, Family and Community Services,. Retrieved March 9, 2017, from [https://www.adhc.nsw.gov.au/sp/delivering\\_disability\\_services/behaviour\\_support\\_services](https://www.adhc.nsw.gov.au/sp/delivering_disability_services/behaviour_support_services)
3. National Disability Insurance Agency. (2017a). August 2015 enewsletter. Retrieved from <https://www.ndis.gov.au/august-2015-enewsletter.html>
4. National Disability Insurance Agency. (2017b). Consolidation and expansion. Retrieved from <https://www.ndis.gov.au/consolidation-expansion.html>
5. National Disability Insurance Agency. (2017c). Developing your child's participant statement. Retrieved from <https://www.ndis.gov.au/participants/planning-process/developing-childs-plan.html>
6. National Disability Insurance Agency. (2017d). Examples of services and support. Retrieved from <https://www.ndis.gov.au/people-disability/examples-services-and-support.html>
7. National Disability Insurance Agency. (2017e). Factsheet: supports the NDIS will fund in relation to early childhood. Retrieved from <https://www.ndis.gov.au/document/factsheet-supports-ndis-will-fund-i.html>
8. National Disability Insurance Agency. (2017f). Family support - what the NDIS will fund. Retrieved from <https://www.ndis.gov.au/families-carers/family-supports.html>
9. National Disability Insurance Agency. (2017g). FAQs - people with disability. Retrieved from <https://www.ndis.gov.au/ILC-FAQ-People-with-Disability.html>
10. National Disability Insurance Agency. (2017h). February enewsletter - we share some participant stories and seek your feedback. Retrieved from <https://www.ndis.gov.au/february-enewsletter-we-share-some-parti.html>
11. National Disability Insurance Agency. (2017i). IAC advice on reasonable and necessary support across the lifespan: An ordinary life for people with disability. Retrieved from <https://www.ndis.gov.au/about-us/governance/IAC/iac-reasonable-necessary-lifespan.html>
12. National Disability Insurance Agency. (n.d.-j). National Disability Insurance Scheme - NDIS home page. Retrieved March 9, 2017, from <https://www.ndis.gov.au/>
13. National Disability Insurance Agency. (2017j). National disability advocacy program. Retrieved from <https://www.ndis.gov.au/participants/making-decisions-about-support/ndap.html>
14. National Disability Insurance Agency. (2017k). NDIS features. Retrieved from <https://www.ndis.gov.au/people-disability/videos-and-stories/comeos.html>
15. National Disability Insurance Agency. (2017l). Operational guidelines - Overview of the NDIS. Retrieved from <https://www.ndis.gov.au/operational-guideline/overview.html#5.1.1>
16. National Disability Insurance Agency. (2017m). Operational guidelines - Planning. Retrieved from <https://www.ndis.gov.au/operational-guideline/planning/timeframes-preparing-plan.html>
17. National Disability Insurance Agency. (2017n). Part 3.1 - agency performance (cont.). Retrieved from <https://www.ndis.gov.au/part3-agency-payments.html>
18. National Disability Insurance Agency. (2017o). Planning. Retrieved from <https://www.ndis.gov.au/operational-guideline/planning/participant-statement-goals.html>
19. National Disability Insurance Agency. (2017p). Programme 1.1: reasonable and necessary care and support for participants. Retrieved from <https://www.ndis.gov.au/programme-1-1.html>
20. National Disability Insurance Agency. (2017q). Safeguards. Retrieved from <https://www.ndis.gov.au/participants/safeguards.html>
21. National Disability Insurance Agency. (2017r). Starting my plan. Retrieved from <https://www.ndis.gov.au/participants/startingmyplan.html>

22. National Disability Insurance Agency. (n.d.-s). Starting my plan. Retrieved March 9, 2017, from <https://www.ndis.gov.au/participants/startingmyplan.html>
23. National Disability Insurance Agency. (n.d.-t). Starting my plan with a local area coordinator (LAC). Retrieved March 9, 2017, from <https://www.ndis.gov.au/medias/zip/documents/h9a/hbd/8799411109918/Starting-my-plan-with-a-Local-Area-Coordinator-LAC>
24. New South Wales Government. (2012a). Living life my way. Putting people with a disability at the centre of decision making. Outcomes of statewide consultations. Retrieved from [https://www.adhc.nsw.gov.au/\\_data/assets/file/0018/262530/Stage\\_3\\_consult\\_report\\_Aug2012.pdf](https://www.adhc.nsw.gov.au/_data/assets/file/0018/262530/Stage_3_consult_report_Aug2012.pdf)
25. New South Wales Government, F. a. C. S. (2011). Living life my way. Putting people with a disability at the centre of decision making. Outcomes of statewide consultations. Retrieved from [https://www.adhc.nsw.gov.au/\\_data/assets/file/0006/254832/PCA\\_Consultation\\_Report.rtf](https://www.adhc.nsw.gov.au/_data/assets/file/0006/254832/PCA_Consultation_Report.rtf)
26. St Vincent de Paul Society. (2017). Local area coordinator - position description. Retrieved March 9, 2017, from [https://www.vinnies.org.au/icms\\_docs/237753\\_PD\\_-\\_Local\\_Area\\_Coordinator.pdf](https://www.vinnies.org.au/icms_docs/237753_PD_-_Local_Area_Coordinator.pdf)
27. Uniting Care. (2017). NDIS local area coordination. Retrieved March 9, 2017, from <https://uniting.org/join-our-team/current-vacancies/join-our-team-LAC>
28. St Vincent de Paul Society. (2017). Local area coordinator - job advertisement. Retrieved March 9, 2017, from <http://lccqld.applynw.net.au/jobs/VIN287-ndis-local-area-coordinator-sydney>
29. Uniting Care. (2017a). Local area coordinator - job advertisement. Retrieved July 6, 2017, from <https://www.carecareers.com.au/job/community-jobs/70924-ndis-local-area-coordinator-uniting-western-sydney/>
30. FACS. (2012a). New South Wales Government - Family and Community Services. (2012a). Addendum to the standards in action manual: women with disability. Retrieved March 9, 2017, from [http://www.adhc.nsw.gov.au/\\_data/assets/file/0008/338948/addendum\\_standards\\_in\\_action\\_manual\\_women\\_with\\_disability.pdf](http://www.adhc.nsw.gov.au/_data/assets/file/0008/338948/addendum_standards_in_action_manual_women_with_disability.pdf)
31. FACS. (2015b). New South Wales Government – Family and Community Services. (2015b). Complex communication needs. Practice guide for speech pathologists who support people with disability. Retrieved March 9, 2017, from [https://www.adhc.nsw.gov.au/sp/delivering\\_disability\\_services/core\\_standards/speech-pathology](https://www.adhc.nsw.gov.au/sp/delivering_disability_services/core_standards/speech-pathology)
32. FACS. (2015c). New South Wales Government - Family and Community Services. (2015c). Guidelines for NSW community care supports program. 2.0. Retrieved March 9, 2017, from [http://www.adhc.nsw.gov.au/\\_data/assets/file/0006/275685/Guidelines\\_NSW\\_CCSP\\_2015\\_v2.0.pdf](http://www.adhc.nsw.gov.au/_data/assets/file/0006/275685/Guidelines_NSW_CCSP_2015_v2.0.pdf)
33. FACS. (2016). New South Wales Government – Family and Community Services. (2015d). Individual funding handbook. Retrieved March 9, 2017, from [https://www.adhc.nsw.gov.au/sp/delivering\\_disability\\_services/individual-funding](https://www.adhc.nsw.gov.au/sp/delivering_disability_services/individual-funding)
34. New South Wales Government - Family and Community Services. (2015c). Guidelines for NSW community care supports program. 2.0. Retrieved March 9, 2017, from [http://www.adhc.nsw.gov.au/\\_data/assets/file/0006/275685/Guidelines\\_NSW\\_CCSP\\_2015\\_v2.0.pdf](http://www.adhc.nsw.gov.au/_data/assets/file/0006/275685/Guidelines_NSW_CCSP_2015_v2.0.pdf)
35. FACS. (2013). New South Wales Government - Family and Community Services. (2013). Report on the trial of the national disability insurance scheme in the Hunter, New South Wales. 1. Retrieved March 9, 2017, from [www.adhc.nsw.gov.au/\\_data/assets/file/0009/338814/Practice\\_Guide\\_to\\_Person\\_Centred\\_Clinical\\_Risk\\_Assessment.pdf](http://www.adhc.nsw.gov.au/_data/assets/file/0009/338814/Practice_Guide_to_Person_Centred_Clinical_Risk_Assessment.pdf)

36. NSW Govt. (2012a). New South Wales Government - Family and Community Services. Living life my way. Putting people with a disability at the centre of decision making about their supports in NSW. Discussion Paper. Retrieved March 9 2017  
from [https://www.adhc.nsw.gov.au/\\_data/assets/file/0009/255663/ADHC\\_PCA\\_Stage3\\_DiscussionPaper.rtf](https://www.adhc.nsw.gov.au/_data/assets/file/0009/255663/ADHC_PCA_Stage3_DiscussionPaper.rtf)
37. NSW Govt. (2012b). New South Wales Government - Family and Community Services. Living life my way. What you told us and what will happen next. A summary of the consultation process. Easy read version. Retrieved March 9 2017  
from [https://www.adhc.nsw.gov.au/\\_data/assets/file/0008/262907/Easy\\_English\\_consultation\\_outcomes\\_report.pdf](https://www.adhc.nsw.gov.au/_data/assets/file/0008/262907/Easy_English_consultation_outcomes_report.pdf)
38. NSW Govt (2015d). New South Wales Government - Family and Community Services. (2015). Supports for children and young people 9-18 years and their families. Framework for service providers. Retrieved March 9, 2017,  
from [http://www.adhc.nsw.gov.au/\\_data/assets/file/0006/332529/Supports\\_for\\_children\\_and\\_young\\_people\\_9\\_to\\_18\\_years\\_and\\_their\\_families\\_Framework\\_for\\_service\\_providers.PDF](http://www.adhc.nsw.gov.au/_data/assets/file/0006/332529/Supports_for_children_and_young_people_9_to_18_years_and_their_families_Framework_for_service_providers.PDF)
39. NSW Govt. (2015a). New South Wales Government - Family and Community Services. (2015). Community participation. Choosing a service provider. Information for people with disability. Service providers in NSW. Retrieved March 9, 2017,  
from [http://www.adhc.nsw.gov.au/\\_data/assets/file/0006/336543/20160901\\_CP\\_service\\_provider\\_booklet.pdf](http://www.adhc.nsw.gov.au/_data/assets/file/0006/336543/20160901_CP_service_provider_booklet.pdf)
40. NSW Govt. (2016). New South Wales Government - Family and Community Services. (2016). Individual funding handbook. Retrieved March 9, 2017,  
from [http://www.adhc.nsw.gov.au/\\_data/assets/file/0014/320504/Individual\\_Funding\\_Handbook\\_Updated\\_version\\_2016\\_endorsed.pdf](http://www.adhc.nsw.gov.au/_data/assets/file/0014/320504/Individual_Funding_Handbook_Updated_version_2016_endorsed.pdf)
41. NSW Govt. (2011). New South Wales Government - Family and Community Services. (2011). Living life my way. Putting people with a disability at the centre of decision making. Outcomes of statewide consultations. Retrieved March 9 2017  
from [https://www.adhc.nsw.gov.au/\\_data/assets/file/0006/254832/PCA\\_Consultation\\_Report.rtf](https://www.adhc.nsw.gov.au/_data/assets/file/0006/254832/PCA_Consultation_Report.rtf)
42. NSW Govt. (2017). New South Wales Government - Family and Community Services. (2017). What support may benefit you? Retrieved March 9, 2017,  
from [https://www.adhc.nsw.gov.au/individuals/support/everyday\\_living\\_support/what\\_support\\_may\\_benefit\\_you](https://www.adhc.nsw.gov.au/individuals/support/everyday_living_support/what_support_may_benefit_you)
43. FACS. (2012b). New South Wales Government - Family and Community Services. (2012b). Case manager level 1 (identified) / Ageing Disability and Home Care (ADHC) Penrith. Retrieved March 9, 2017, from <http://tradejobs.com.au/healthcare-and-medical-jobs/-case-manager-level-1-identified-ageing-disability-and-home-care-adhc-penrith/2262414>

### Documents referenced (2019)

1. Mid Coast Communities (June 2019) NDIS Local Area Coordinator Information package: Coffs Harbour NSW
2. St Vincent de Paul (June 2019) Local Area Coordinator Job advertisement and job description. Taree.
3. St Vincent de Paul (June 2019) Local Area Coordinator Position Description

National Disability Insurance Scheme (NDIS). (2016). *NDIS Price Guide VIC/NSW/QLD/TAS*. Geelong: NDIS.

4. Social Futures (July 2019) Local Area Coordinator Position advertisement  
[file:///Volumes/SUZ%203\\_2019/Julia%20Good/Paper/health%20and%20social%20care/recent%20job%20ads%20and%20descriptions/Social%20Futures%20-%20Local%20Area%20Coordinator.webarchive](file:///Volumes/SUZ%203_2019/Julia%20Good/Paper/health%20and%20social%20care/recent%20job%20ads%20and%20descriptions/Social%20Futures%20-%20Local%20Area%20Coordinator.webarchive)
5. Social Futures (June 2018) Local Area Coordinator Position description Ballina
6. Uniting (2019) General description <https://uniting.org/services/disability-services/uniting-and-ndis/local-area-coordinators>
7. National Disability Insurance Scheme (2019) website broad description of the Local Area Coordinator role <https://www.ndis.gov.au/understanding/what-ndis/whos-rolling-out-ndis/lac-partners-community>
8. National Disability Insurance Scheme (2016) NDIS Price Guide VIC/NSW/QLD/TAS, Geelong, released 24 June 2016 <https://www.ndis.gov.au/providers/price-guides-and-information/price-guide-archive>
9. National Disability Insurance Scheme (2018/2019) NDIS Price Guide VIC/NSW/QLD/TAS, Geelong, released 1 February 2019 <https://www.ndis.gov.au/providers/price-guides-and-information/price-guide-archive>
10. National Disability Insurance Scheme (2019/20) NDIS Price Guide VIC/NSW/QLD/TAS, Geelong, released July 2019 <https://www.ndis.gov.au/providers/price-guides-and-information>
